# Supplementary material for: Chiroptical and magnetic properties of star-shaped FeIII4 complexes from chiral Schiff bases. Structural and magnetic correlations based on continuous shape measures
Source: Royal Society of Chemistry journal article supplement (doi:10.1039/c8dt01684d), 2018-01-01
Supplement: c8dt01684d1.pdf [file c8dt01684d1.pdf]

Electronic Supplementary Information (ESI) for

**" Chiroptical and magnetic properties of star-shaped  $Fe^{III}_4$  complexes from chiral Schiff bases. Structural and magnetic correlations based on continuous shape measurements "**

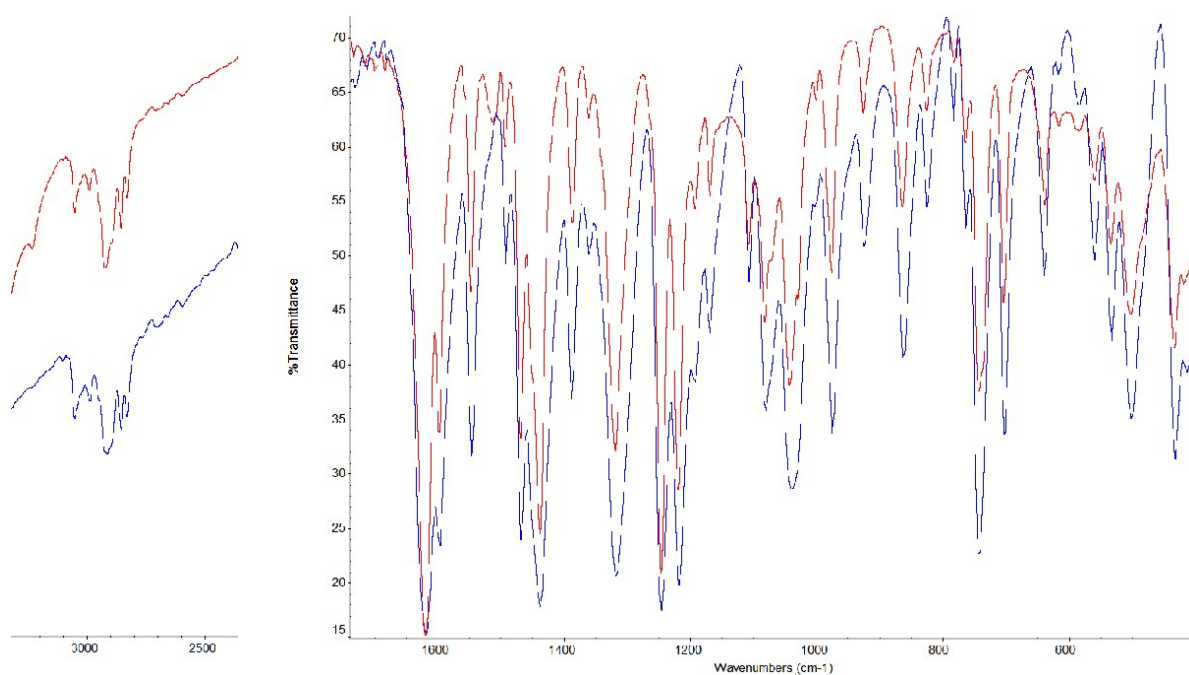

**Fig S1.** IR spectra for the enantiomers of **1R** (red) and **1S** (blue).

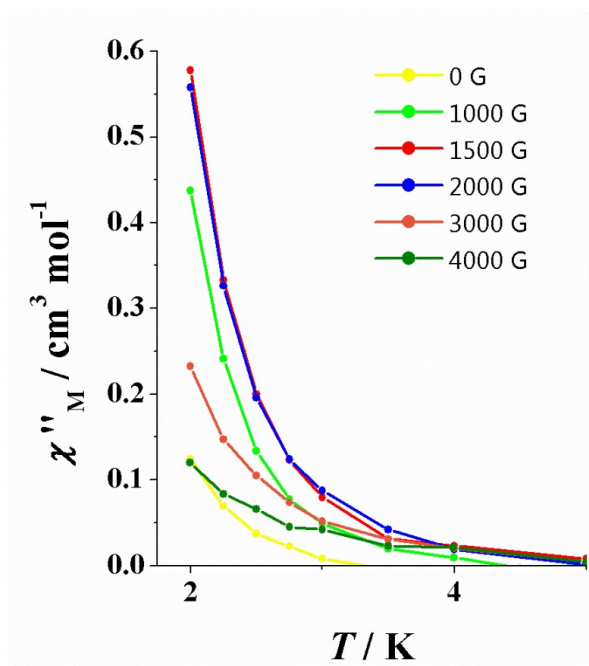

**Fig S2.** AC response of the under different static fields and at the 1000 Hz frequency for complex **1R**. From these data the 1500 G field was selected for the alternate current measurements.

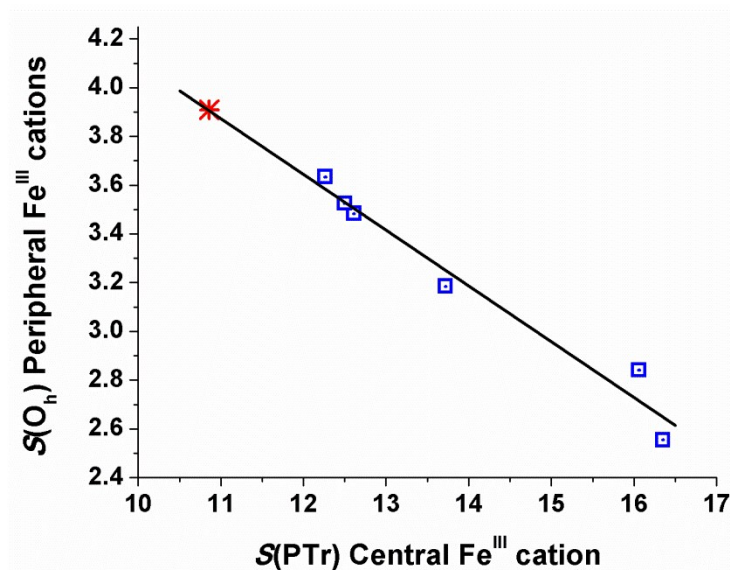

**Fig S3.**  $S(\text{PTTr})$  for the central  $\text{Fe}^{\text{III}}$  cations versus  $S(\text{O}_h)$  for the peripheral ones, showing the correspondence between both distortions for the reported complexes type **VI**. (Red star shows the values for complex **1S** that shows the larger distortion from the regular polyhedra.

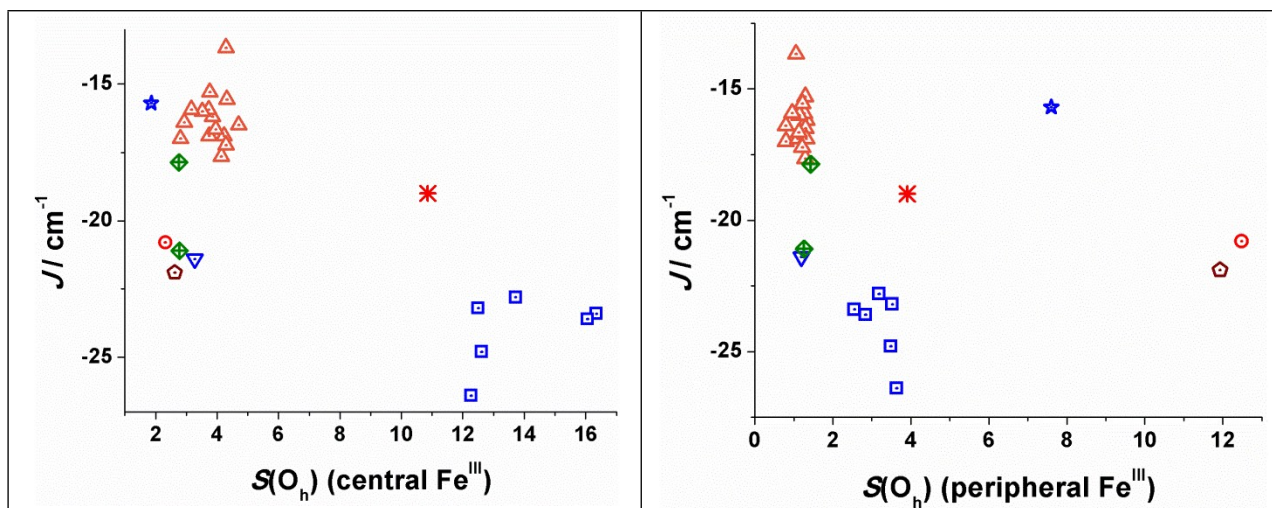

**Fig S4**  $S(\text{O}_h)$  vs.  $J$  for all the reported  $\text{Fe}_4$  complexes. Any direct correlation can be extracted between the distortion of the central or peripheral environments and the magnitude of the interaction. However, each type of complexes shows a range of characteristic values.

**Table S1.** Selected bond distances (Å) and angles (°) for the core of compound **2RS**.

|           |           |           |           |
|-----------|-----------|-----------|-----------|
| Fe1-O1    | 1.901(2)  | Fe1-O5    | 1.931(2)  |
| Fe1-O2    | 1.963(2)  | Fe1-N1    | 2.137(2)  |
| Fe1-O4    | 2.206(2)  | Fe1-N2    | 2.128(2)  |
|           |           |           |           |
| O1-Fe1-O2 | 161.22(7) | O4-Fe1-O5 | 154.56(7) |
| O1-Fe1-O4 | 95.76(7)  | O4-Fe1-N1 | 92.23(7)  |
| O1-Fe1-O5 | 99.53(8)  | O4-Fe1-N2 | 73.90(7)  |
| O1-Fe1-N1 | 78.31(8)  | O5-Fe1-N1 | 110.66(8) |
| O1-Fe1-N2 | 91.09(8)  | O5-Fe1-N2 | 85.55(8)  |
| O2-Fe1-O4 | 83.07(7)  | N1-Fe1-N2 | 161.75(8) |
| O2-Fe1-O5 | 88.70(7)  |           |           |
| O2-Fe1-N1 | 82.99(8)  |           |           |
| O2-Fe1-N2 | 106.45(8) |           |           |

**Table S2.** Fit values for the  $\tau_0$  and  $U_{\text{eff}}$  parameters from the  $\ln(\chi''/\chi')$  vs.  $1/T$  plots.

| Frequency (Hz) | $\tau_0$  | $U_{\text{eff}}$ |
|----------------|-----------|------------------|
| 1488.1         | 7.02 E-07 | 10.22            |
| 1320.4         | 5.61 E-07 | 10.68            |
| 1143.3         | 4.77 E-07 | 11.03            |
| 997.3          | 5.06 E-07 | 10.96            |
| 852.3          | 5.24 E-07 | 10.94            |
| 679.3          | 5.19 E-07 | 11.02            |
| 509.5          | 6.02 E-07 | 10.81            |
| 349.8          | 8.29 E-07 | 10.31            |

Table S3  $S(O_h)$  and  $S(PTr)$  values calculated for the central and peripheral cation of the reported  $Fe_4$  star-shaped systems.

| CCDC   | Type | Central $Fe^{III}$ |          | Peripheral $Fe^{III}$ |            |            |            |            |            | Peripheral $Fe^{III}$ |               |
|--------|------|--------------------|----------|-----------------------|------------|------------|------------|------------|------------|-----------------------|---------------|
|        |      | $S(O_h)$           | $S(PTr)$ | $S_1(O_h)$            | $S_1(PTr)$ | $S_2(O_h)$ | $S_2(PTr)$ | $S_3(O_h)$ | $S_3(PTr)$ | Mean $S(O_h)$         | Mean $S(PTr)$ |
| AGAQIJ | I    | 3.849              | 5.630    | 1.263                 | 10.096     | 1.274      | 10.006     | 1.445      | 9.557      | 1.327                 | 9.886         |
| DOPKAV | I    | 3.114              | 6.488    | 1.120                 | 10.559     | 0.868      | 11.381     | 0.696      | 12.199     | 0.895                 | 11.380        |
| DUFNUO | I    | 2.809              | 7.149    | 0.991                 | 11.613     | 0.601      | 13.051     |            |            | 0.796                 | 12.332        |
| DUFPAW | I    | 2.936              | 6.860    | 0.958                 | 11.876     | 0.623      | 12.875     |            |            | 0.790                 | 12.375        |
| DUPSAK | I    | 3.727              | 5.658    | 1.382                 | 10.119     | 1.149      | 10.358     |            |            | 1.265                 | 10.239        |
| ICOCIN | I    | 3.767              | 5.619    | 1.443                 | 10.081     | 1.130      | 10.430     |            |            | 1.287                 | 10.255        |
| ITAKUJ | I    | 4.701              | 4.676    | 1.295                 | 10.102     |            |            |            |            | 1.295                 | 10.102        |
| KAXGUN | I    | 3.746              | 5.644    | 1.141                 | 10.627     | 1.061      | 10.632     |            |            | 1.101                 | 10.630        |
| NIPJEC | I    | 4.228              | 5.161    | 1.346                 | 9.674      | 1.286      | 10.163     |            |            | 1.316                 | 9.919         |
| TACFUA | I    | 4.292              | 4.990    | 1.005                 | 10.822     | 1.105      | 10.634     |            |            | 1.055                 | 10.728        |
| TACGAH | I    | 3.957              | 5.396    | 1.380                 | 9.613      | 0.873      | 11.646     |            |            | 1.127                 | 10.629        |
| VOBXUG | I    | 3.520              | 5.983    | 1.226                 | 10.391     | 1.050      | 10.768     |            |            | 1.138                 | 10.580        |
| XUBVUM | I    | 4.140              | 5.254    | 1.576                 | 9.171      | 1.093      | 10.725     | 1.207      | 10.210     | 1.292                 | 10.036        |
| XUBWAT | I    | 4.294              | 5.043    | 1.395                 | 9.577      | 1.033      | 11.023     |            |            | 1.214                 | 10.300        |
| XUBWEX | I    | 4.317              | 5.026    | 1.405                 | 9.581      | 1.036      | 11.026     |            |            | 1.220                 | 10.304        |
| XUBWIB | I    | 3.167              | 6.414    | 0.921                 | 11.156     | 0.992      | 11.060     |            |            | 0.956                 | 11.108        |
| ICOCOT | II   | 3.277              | 7.523    | 1.193                 | 11.619     |            |            |            |            | 1.193                 | 11.619        |
| DEKPAK | III  | 2.780              | 8.687    | 1.413                 | 10.391     | 1.113      | 12.439     |            |            | 1.263                 | 11.415        |
| GANWEA | III  | 2.766              | 8.882    | 1.630                 | 9.762      | 1.229      | 11.867     |            |            | 1.430                 | 10.814        |
| ABOKIL | IV   | 2.449              | 9.947    | 11.733                | 3.734      | 10.817     | 4.824      |            |            | 11.275                | 4.279         |
| ABOLEI | IV   | 2.400              | 9.858    | 12.439                | 3.632      | 12.606     | 3.094      |            |            | 12.522                | 3.363         |
| MEMKAR | IV   | 2.318              | 10.452   | 14.082                | 3.413      | 11.412     | 3.981      | 11.953     | 3.190      | 12.482                | 3.528         |
| SAGBOU | IV   | 2.654              | 9.572    | 13.013                | 3.816      | 11.868     | 3.911      | 11.790     | 4.008      | 12.224                | 3.912         |
| CUHJEW | V    | 1.859              | 12.764   | 5.124                 | 5.882      | 9.085      | 2.769      | 8.593      | 2.919      | 7.601                 | 3.857         |
| TACHIR | V    | 1.792              | 13.075   | 6.953                 | 4.008      | 6.617      | 4.035      | 8.570      | 3.298      | 7.380                 | 3.780         |
| JORWAQ | VI   | 16.350             | 0.466    | 2.554                 | 9.721      |            |            |            |            | 2.554                 | 9.721         |
| UVIPUL | VI   | 16.059             | 0.550    | 2.800                 | 9.166      | 3.114      | 9.172      | 2.608      | 9.559      | 2.841                 | 9.299         |
| XOKDEI | VI   | 12.611             | 0.975    | 3.444                 | 8.048      | 3.725      | 7.148      | 3.283      | 8.419      | 3.484                 | 7.872         |
| XOKDIM | VI   | 12.502             | 0.987    | 3.913                 | 6.941      | 3.262      | 8.389      | 3.401      | 8.032      | 3.525                 | 7.787         |
| XOKDOS | VI   | 12.266             | 1.094    | 3.668                 | 7.857      | 4.273      | 7.018      | 2.961      | 8.416      | 3.634                 | 7.763         |
| XOKQAR | VI   | 13.718             | 0.790    | 3.332                 | 8.486      | 3.087      | 8.528      | 3.134      | 8.819      | 3.184                 | 8.611         |
| 1S     | VI   | 10.861             | 1.618    | 4.082                 | 7.147      | 2.421      | 9.530      | 5.225      | 6.318      | 3.909                 | 7.665         |
| AHOTEX | VII  | 2.624              | 10.588   | 11.628                | 6.205      | 11.684     | 6.228      | 12.476     | 6.001      | 11.929                | 6.144         |
| DAMREQ | VIII | 0.843              | 15.123   | 3.305                 | 6.029      | 2.844      | 6.771      |            |            | 3.074                 | 6.400         |
| GAGREM | VIII | 5.888              | 3.855    | 1.284                 | 13.660     | 1.270      | 13.577     |            |            | 1.277                 | 13.619        |

|               |             |       |       |       |       |      |      |       |       |
|---------------|-------------|-------|-------|-------|-------|------|------|-------|-------|
| <b>LEBRIU</b> | <b>VIII</b> | 3.234 | 8.247 | 3.078 | 7.170 | PyQ* | PyQ* | 3.078 | 7.170 |
|---------------|-------------|-------|-------|-------|-------|------|------|-------|-------|

\* Square pyramidal environment.
